# Supplementary material for: Alchemical Free-Energy Calculations of Watson–Crick and Hoogsteen Base Pairing Interconversion in DNA
Source: PubMed Central journal article supplement (PMC9648191; doi:10.1021/acs.jctc.2c00848), 2022-10-06
Supplement: ct2c00848_si_001.pdf [file ct2c00848_si_001.pdf]

# **SUPPORTING INFORMATION**

## **Alchemical Free Energy Calculations of Watson–Crick and Hoogsteen Base Pairing Interconversion in DNA**

Inacrist Geronimo and Marco De Vivo\*

Laboratory of Molecular Modelling & Drug Discovery, Istituto Italiano di Tecnologia, Via  
Morego 30, Genoa 16163, Italy

**\*Corresponding author:**

Marco De Vivo, Email: [marco.devivo@iit.it](mailto:marco.devivo@iit.it)

**General unbiased MD simulation protocol.** The systems were minimized for 1000 steps using the steepest descent algorithm, followed by the conjugate gradient algorithm, until the maximum force was less than 100 kJ mol<sup>-1</sup> nm<sup>-1</sup>. Subsequently, the systems were heated to 300 K (isolated AT-rich DNA) or 310 K (binary 8-oxoguanine (8OG)-damaged DNA/polymerase  $\mu$  complex) for 100 ps in the NVT ensemble and equilibrated for 500 ps in the NPT ensemble with all heavy atoms restrained. Constant temperature was maintained using Langevin dynamics<sup>1</sup> with a time coupling constant of 2 ps. A constant pressure of 1 bar was maintained using the Berendsen algorithm<sup>2</sup> during equilibration, and the Parrinello–Rahman algorithm<sup>3</sup> during production with a time coupling constant of 2 ps. Periodic boundary conditions were applied, and long-range electrostatic interactions were calculated using the particle mesh Ewald method<sup>4</sup> with a real-space cut-off of 12 Å. Bonds with hydrogen were constrained using the LINCS algorithm,<sup>5</sup> which allowed a time step of 2 fs.

**Charge derivation for 8OG.** Geometry optimization of the *anti* and *syn* conformations of 8OG at the MP2/6-31G\* level and electrostatic potential calculations at the HF/6-31G\* level were performed using Gaussian 09.<sup>6</sup> Subsequently, a multi-conformational restrained electrostatic potential<sup>7,8</sup> fitting over the two 8OG conformations was performed using antechamber.<sup>9</sup> Only the charges of the purine, C1', and H1' atoms were derived, while the rest of the atoms were constrained to have the same charges as those in undamaged deoxyguanosine (Table S1).

**Table S1.** Derived partial charges of 8-oxoguanine.<sup>a</sup>

| Atom name | Atom type | Charge    | Atom name | Atom type | Charge    |
|-----------|-----------|-----------|-----------|-----------|-----------|
| N9        | N*        | -0.004566 | H1        | H         | 0.348606  |
| C8        | C         | 0.408236  | C2        | CA        | 0.717325  |
| O8        | O         | -0.490468 | N2        | N2        | -0.811768 |
| N7        | NA        | -0.548021 | H21       | H         | 0.372421  |
| H7        | H         | 0.398226  | H22       | H         | 0.372421  |
| C5        | CB        | 0.007740  | N3        | NC        | -0.529776 |
| C6        | C         | 0.609879  | C4        | CB        | 0.106197  |
| O6        | O         | -0.625336 | C1'       | CT        | 0.543252  |
| N1        | NA        | -0.576626 | H1'       | H2        | -0.176142 |

<sup>a</sup> For the other atoms, the atom types and charges are the same as those of deoxyguanosine.

```

; residue      5 8AS rtp 8AS q -1.2
125  P          5 8AS P      125  1.165900  30.9700
126  O2         5 8AS OP1   126  -0.776100  16.0000
127  O2         5 8AS OP2   127  -0.776100  16.0000
128  OS         5 8AS O5'   128  -0.495400  16.0000
129  CI         5 8AS C5'   129  -0.006900  12.0100
130  H1         5 8AS H5'   130  0.075400  1.0080
131  H1         5 8AS H5''  131  0.075400  1.0080
132  CT         5 8AS C4'   132  0.162900  12.0100
133  H1         5 8AS H4'   133  0.117600  1.0080
134  OS         5 8AS O4'   134  -0.369100  16.0000  DUM_OS  0.000000  1.0000
135  CT         5 8AS C1'   135  0.543252  12.0100  DUM_CT  0.000000  1.0000
136  H2         5 8AS H1'   136  -0.176142  1.0080  DUM_H2  0.000000  1.0000
137  N*         5 8AS N9     137  -0.004566  14.0100  DUM_N*  0.000000  1.0000
138  C          5 8AS C8     138  0.408236  12.0100  DUM_C   0.000000  1.0000
139  O          5 8AS O8     139  -0.490468  16.0000  DUM_O   0.000000  1.0000
140  NA         5 8AS N7     140  -0.548021  14.0100  DUM_NA  0.000000  1.0000
141  H          5 8AS H7     141  0.398226  1.0080  DUM_H   0.000000  1.0000
142  CB         5 8AS C5     142  0.007740  12.0100  DUM_CB  0.000000  1.0000
143  C          5 8AS C6     143  0.609879  12.0100  DUM_C   0.000000  1.0000
144  O          5 8AS O6     144  -0.625336  16.0000  DUM_O   0.000000  1.0000
145  NA         5 8AS N1     145  -0.576626  14.0100  DUM_NA  0.000000  1.0000
146  H          5 8AS H1     146  0.348606  1.0080  DUM_H   0.000000  1.0000
147  CA         5 8AS C2     147  0.717325  12.0100  DUM_CA  0.000000  1.0000
148  N2         5 8AS N2     148  -0.811768  14.0100  DUM_N2  0.000000  1.0000
149  H          5 8AS H21    149  0.372421  1.0080  DUM_H   0.000000  1.0000
150  H          5 8AS H22    150  0.372421  1.0080  DUM_H   0.000000  1.0000
151  NC         5 8AS N3     151  -0.529776  14.0100  DUM_NC  0.000000  1.0000
152  CB         5 8AS C4     152  0.106197  12.0100  DUM_CB  0.000000  1.0000
153  CE         5 8AS C3'   153  0.071300  12.0010
154  H1         5 8AS H3'   154  0.098500  1.0080
155  CT         5 8AS C2'   155  -0.085400  12.0100  DUM_CT  0.000000  1.0000
156  HC         5 8AS H2'   156  0.071800  1.0080  DUM_HC  0.000000  1.0000
157  HC         5 8AS H2''  157  0.071800  1.0080  DUM_HC  0.000000  1.0000
158  OS         5 8AS O3'   158  -0.523200  16.0000
159  DUM_OS     5 8AS D04'   159  0.000000  1.0000  OS      -0.369100  16.0000
160  DUM_CT     5 8AS DC1'   160  0.000000  1.0000  CT      0.543252  12.0100
161  DUM_H2     5 8AS DH1'   161  0.000000  1.0000  H2     -0.176142  1.0080
162  DUM_N*     5 8AS DN9    162  0.000000  1.0000  N*     -0.004566  14.0100
163  DUM_C      5 8AS DC8    163  0.000000  1.0000  C       0.408236  12.0100
164  DUM_O      5 8AS D08    164  0.000000  1.0000  O      -0.490468  16.0000
165  DUM_NA     5 8AS DN7    165  0.000000  1.0000  NA     -0.548021  14.0100
166  DUM_H      5 8AS DH7    166  0.000000  1.0000  H       0.398226  1.0080
167  DUM_CB     5 8AS DC5    167  0.000000  1.0000  CB      0.007740  12.0100
168  DUM_C      5 8AS DC6    168  0.000000  1.0000  C       0.609879  12.0100
169  DUM_O      5 8AS D06    169  0.000000  1.0000  O      -0.625336  16.0000
170  DUM_NA     5 8AS DN1    170  0.000000  1.0000  NA     -0.576626  14.0100
171  DUM_H      5 8AS DH1    171  0.000000  1.0000  H       0.348606  1.0080
172  DUM_CA     5 8AS DC2    172  0.000000  1.0000  CA      0.717325  12.0100
173  DUM_N2     5 8AS DN2    173  0.000000  1.0000  N2     -0.811768  14.0100
174  DUM_H      5 8AS DH21   174  0.000000  1.0000  H       0.372421  1.0080
175  DUM_H      5 8AS DH22   175  0.000000  1.0000  H       0.372421  1.0080
176  DUM_NC     5 8AS DN3    176  0.000000  1.0000  NC     -0.529776  14.0100
177  DUM_CB     5 8AS DC4    177  0.000000  1.0000  CB      0.106197  12.0100
178  DUM_CT     5 8AS DC2'   178  0.000000  1.0000  CT     -0.085400  12.0100
179  DUM_HC     5 8AS DH23   179  0.000000  1.0000  HC      0.071800  1.0080
180  DUM_HC     5 8AS DH24   180  0.000000  1.0000  HC      0.071800  1.0080

```

**Figure S1.** [ atoms ] Directive of the GROMACS topology file showing the transformation of real atoms to virtual atoms and vice versa. When the atom is virtual, the atom type is prefixed by “DUM\_” and the charge is zero.

**Table S2.** Reference glycosyl torsion angles, H-bond distances, and H-bond angles for the harmonic restraints obtained from unbiased MD simulations of isolated AT-rich DNA with Watson–Crick (WC) or Hoogsteen (HG) base pairing modes of A4:T9 (see Scheme 2).

|                               | WC       | HG       |
|-------------------------------|----------|----------|
| Glycosyl torsion angle        | -102.6   | 64.9     |
| H-bond distance (Å)/angle (°) |          |          |
| hb <sub>WC</sub>              | 3.0/10.9 | -        |
| hb <sub>HG</sub>              | -        | 3.1/10.9 |
| hb <sub>C</sub>               | 3.0/11.4 | 2.9/14.3 |

**Table S3.** Reference torsion angles for the harmonic restraints obtained from unbiased MD simulations of the DNA polymerase  $\mu$  binary complex with *anti* or *syn* 8-oxoguanine (see Scheme 2).

| Torsion angle     | <i>anti</i> | <i>syn</i> |
|-------------------|-------------|------------|
| Glycosyl (°)      | -97.8       | 64.8       |
| Base-flipping (°) | 2.8         | 9.1        |

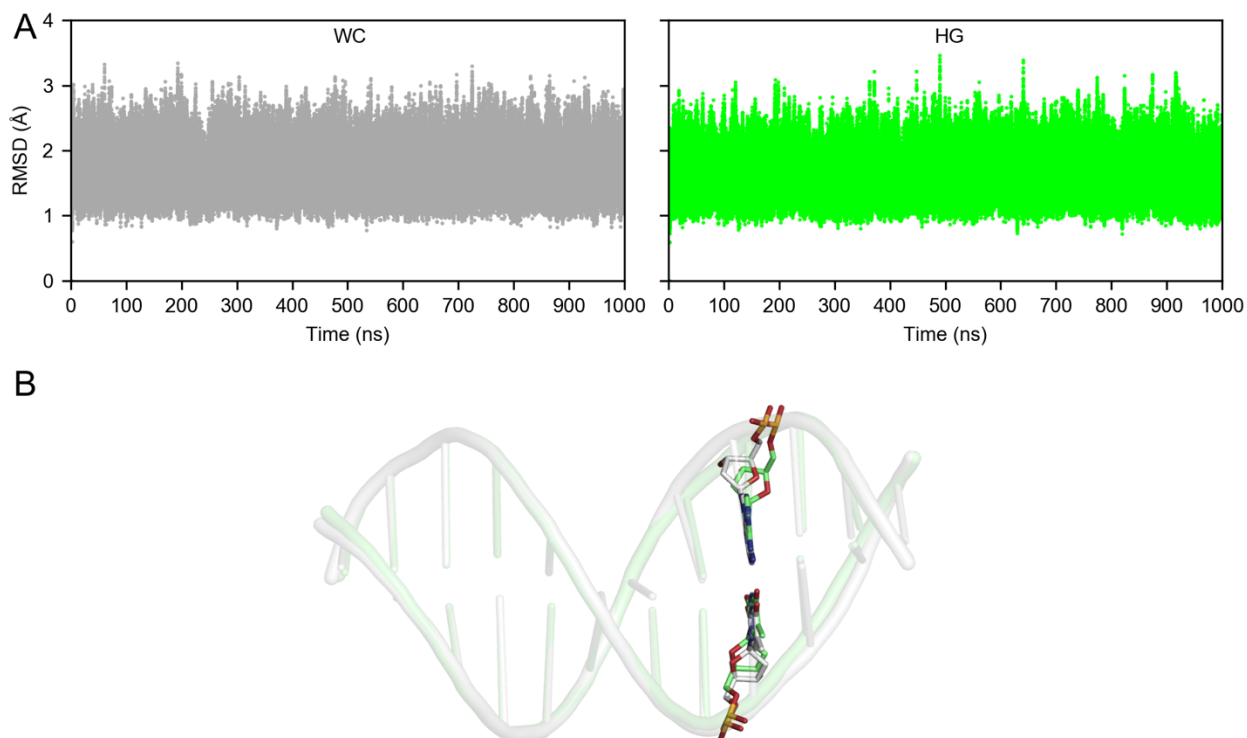

**Figure S2.** (A) Time evolution of backbone RMSDs in isolated AT-rich DNA with Watson–Crick (WC, grey) and Hoogsteen (HG, green) base pairing modes of A4:T9. Terminal base pairs were excluded from the calculation. (B) Comparison of the two structures from unbiased MD simulations.



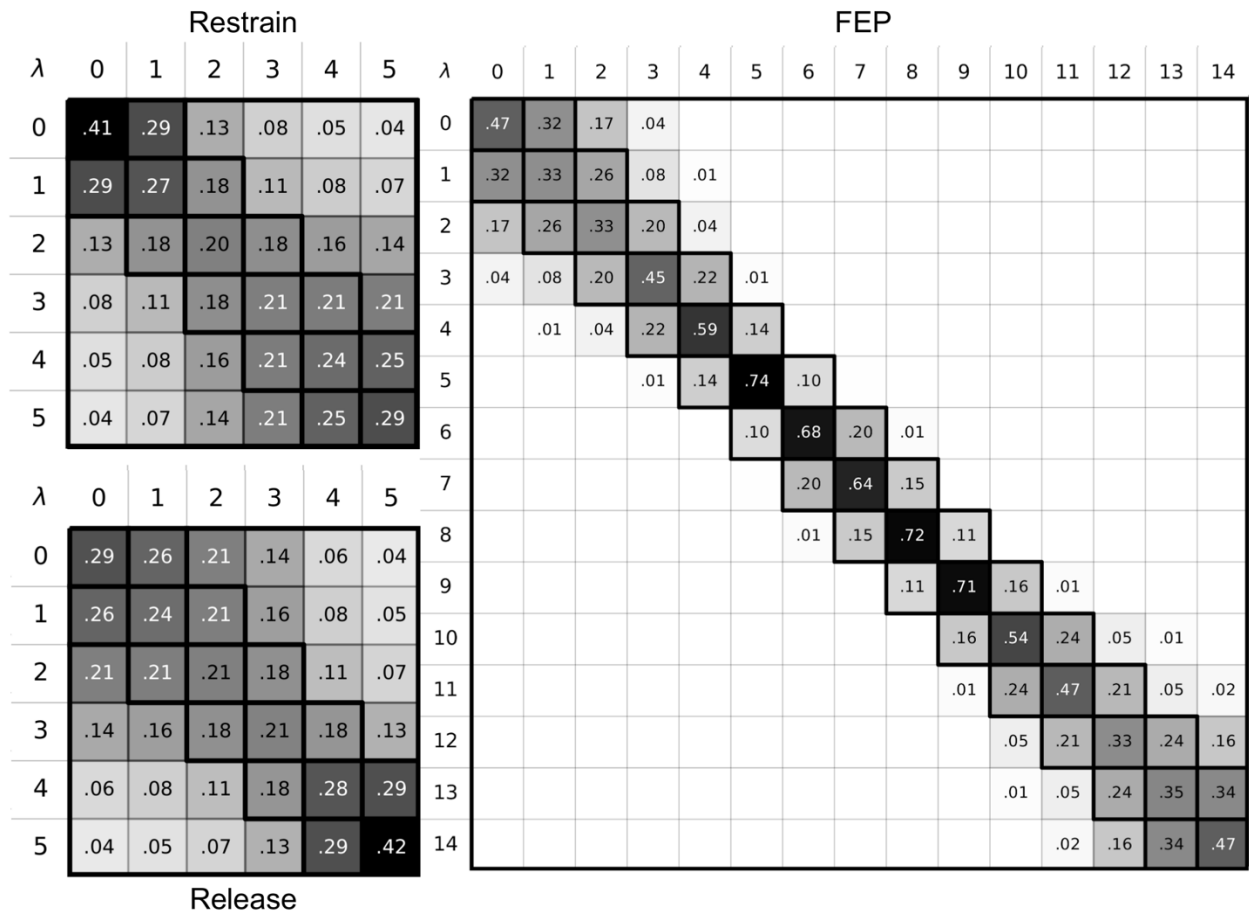

**Figure S3.** Overlap matrices for the three stages of transformation of A4:T9 from Watson–Crick to Hoogsteen base pairing. The element  $O_{ij}$  is the probability of observing a sample from state  $i$  ( $i^{\text{th}}$  row) in state  $j$  ( $j^{\text{th}}$  column). The recommended minimum probability for adjacent states (highlighted by thick black lines) is 0.03.<sup>10</sup>

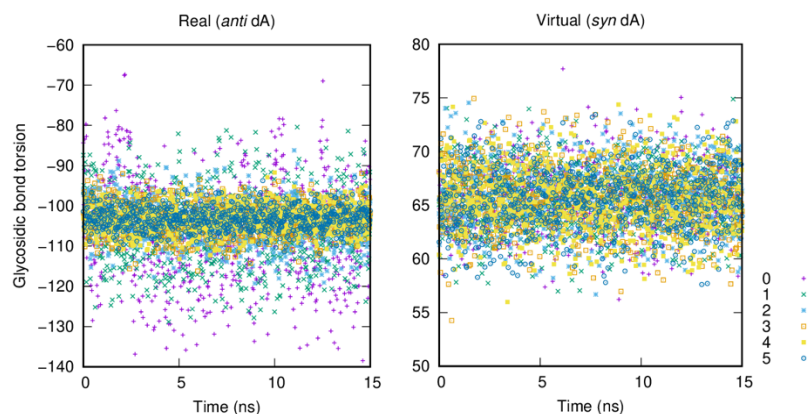

**Figure S4.** Time evolution of the glycosyl torsion angles of *anti* and *syn* A4 at all  $\lambda$ -states during the “restrain” stage of the transformation (data collected every 20 ps). The harmonic restraints on the real atoms were switched on from state 0 to state 5, while those on the virtual atoms were on at all  $\lambda$ -states.

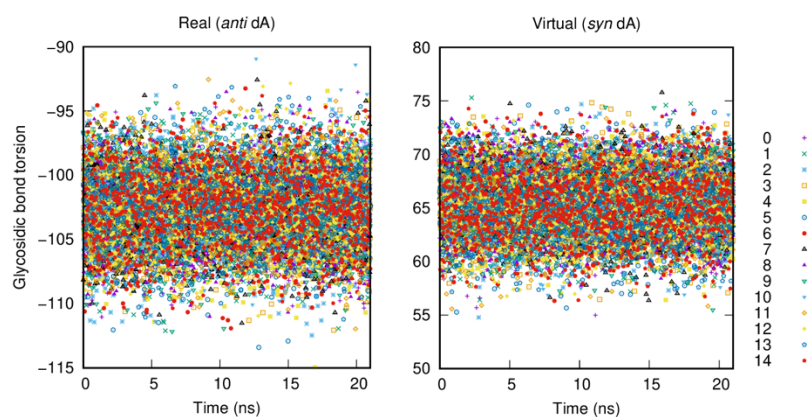

**Figure S5.** Time evolution of the glycosyl torsion angles of *anti* and *syn* A4 at all  $\lambda$ -states during the “FEP” stage of the transformation (data collected every 20 ps). The harmonic restraints on both real and virtual atoms were on at all  $\lambda$ -states.

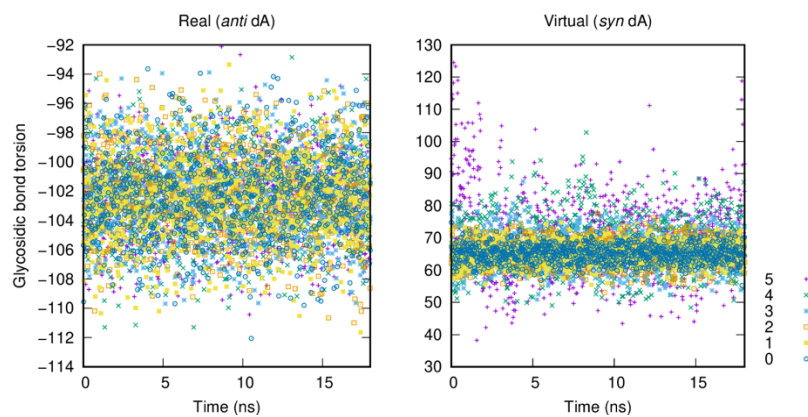

**Figure S6.** Time evolution of the glycosyl angles of *anti* and *syn* A4 at all  $\lambda$ -states during the “release” stage of the transformation (data collected every 20 ps). The harmonic restraints on the virtual atoms were switched off from state 0 to state 5, while those on the real atoms were on at all  $\lambda$ -states.

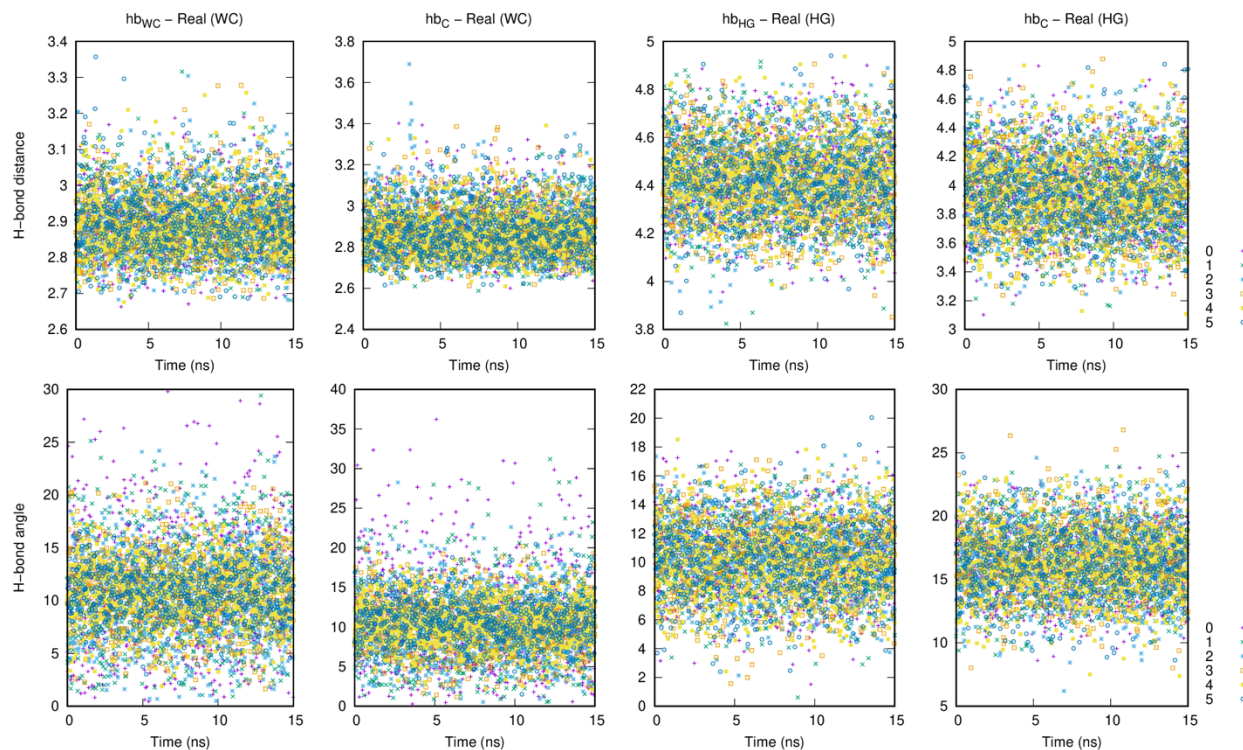

**Figure S7.** Time evolution of the H-bond distances and angles in the Watson–Crick (WC) and Hoogsteen (HG) base pairing modes of A4:T9 (see Scheme 2) at all  $\lambda$ -states during the “restrain” stage of the transformation (data collected every 20 ps). The harmonic restraints on the real atoms were switched on from state 0 to state 5, while those on the virtual atoms were on at all  $\lambda$ -states.

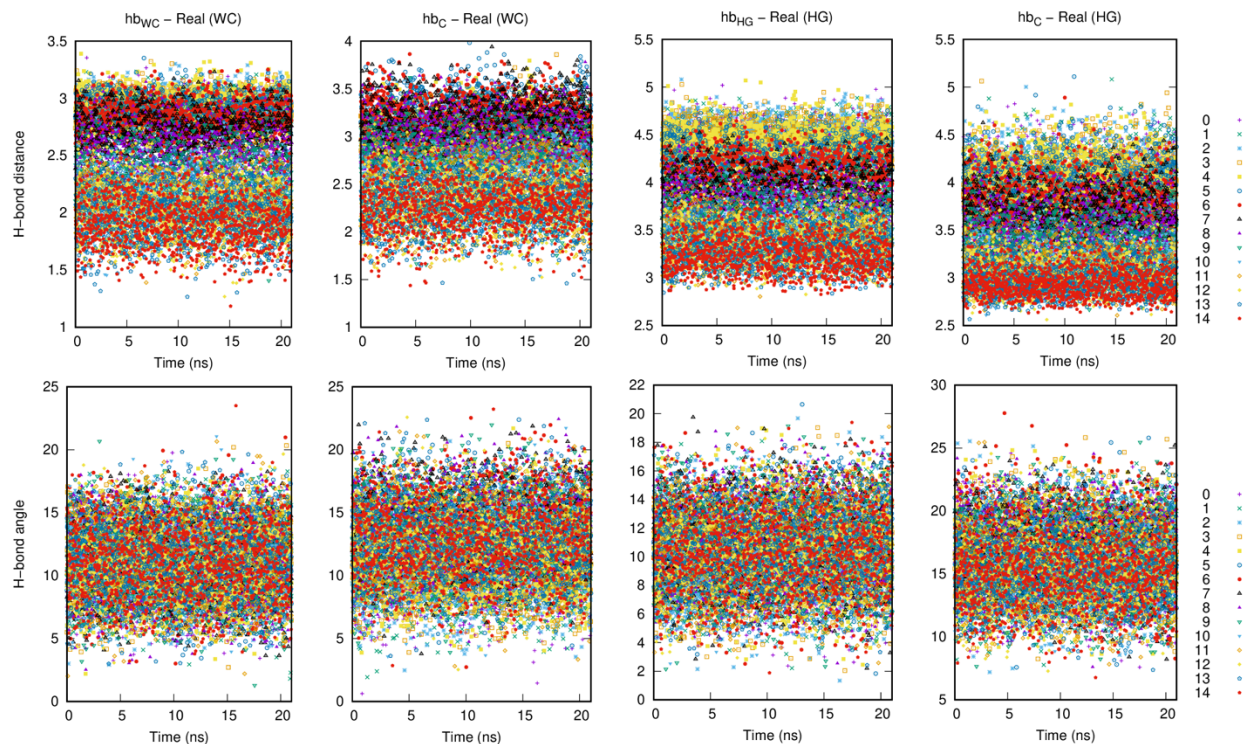

**Figure S8.** Time evolution of the H-bond distances and angles in the Watson–Crick (WC) and Hoogsteen (HG) base pairing modes of A4:T9 (see Scheme 2) at all  $\lambda$ -states during the “FEP” stage of the transformation (data collected every 20 ps). The harmonic restraints on both real and virtual atoms were on at all  $\lambda$ -states.



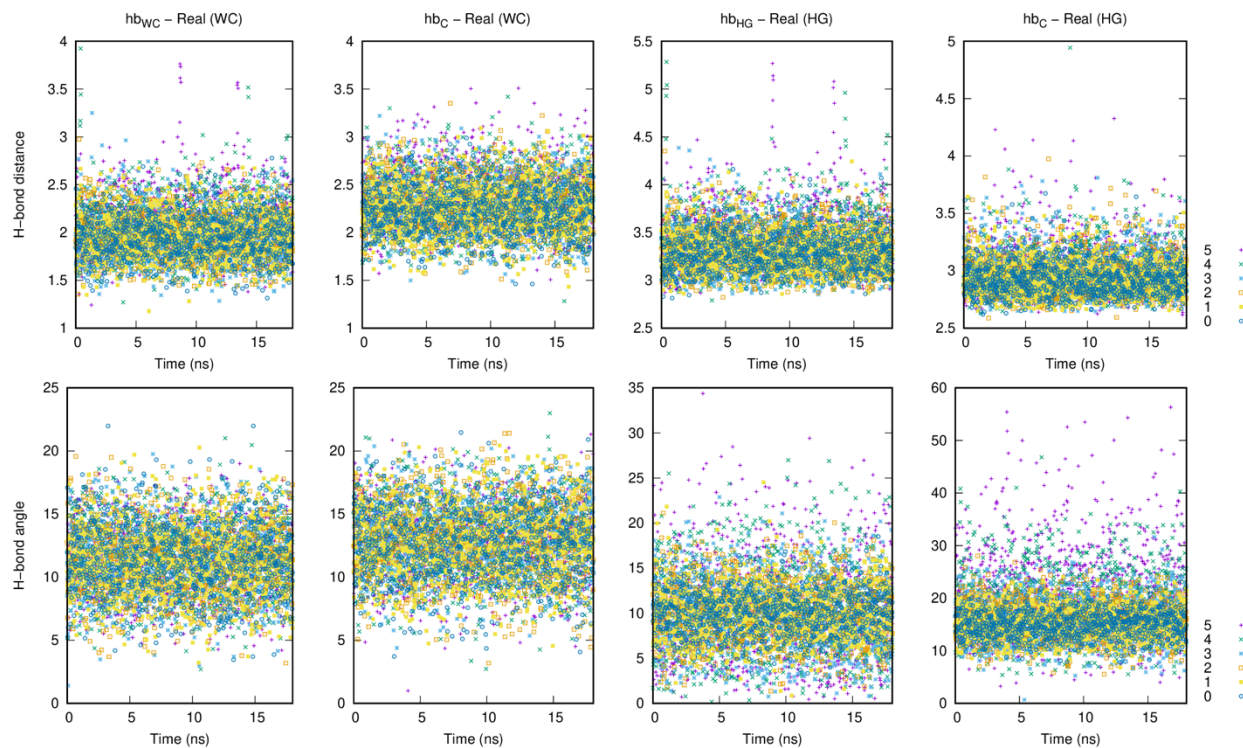

**Figure S9.** Time evolution of the H-bond distances and angles in the Watson–Crick (WC) and Hoogsteen (HG) base pairing modes of A4:T9 (see Scheme 2) at all  $\lambda$ -states during the “release” stage of the transformation (data collected every 20 ps). The harmonic restraints on the virtual atoms were switched off from state 0 to state 5, while those on the real atoms were on at all  $\lambda$ -states.

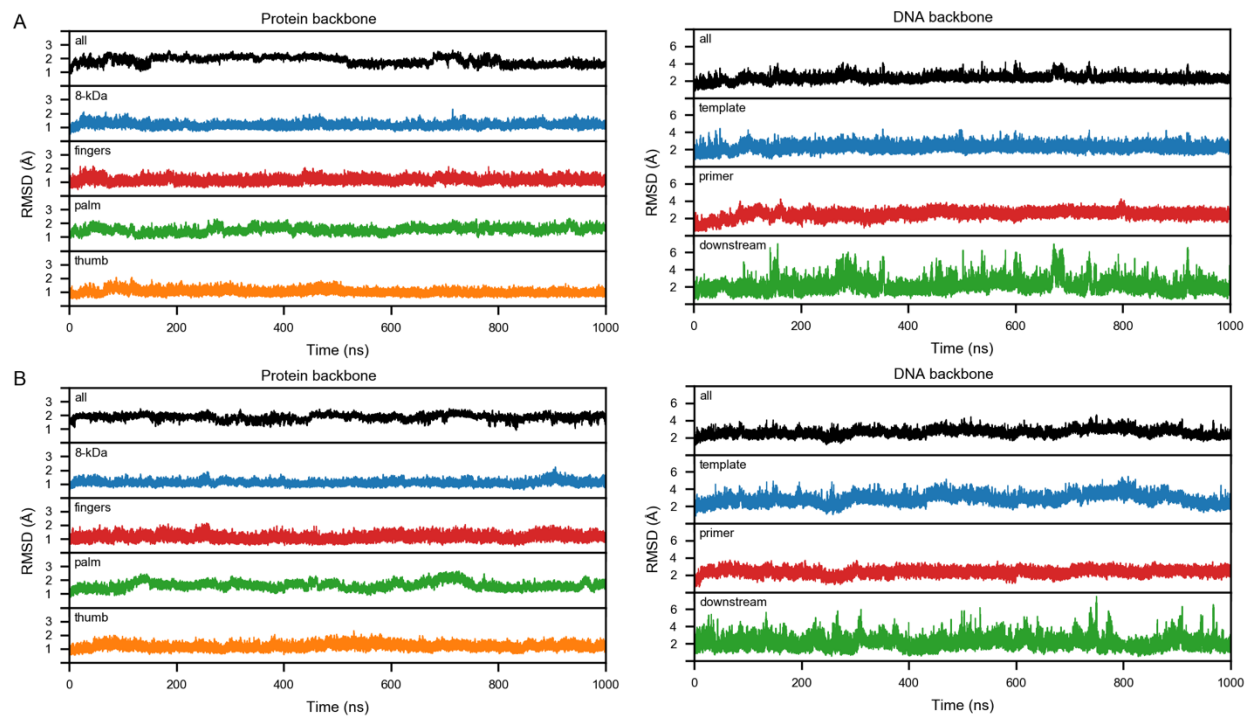

**Figure S10.** Time evolution of backbone RMSDs in the DNA polymerase  $\mu$  binary complex with 8-oxoguanine in the (A) *syn* and (B) *anti* conformations. The flexible loop 1 (C369–F385), which was missing from the crystal structure and added by modeling, was excluded from the calculation.

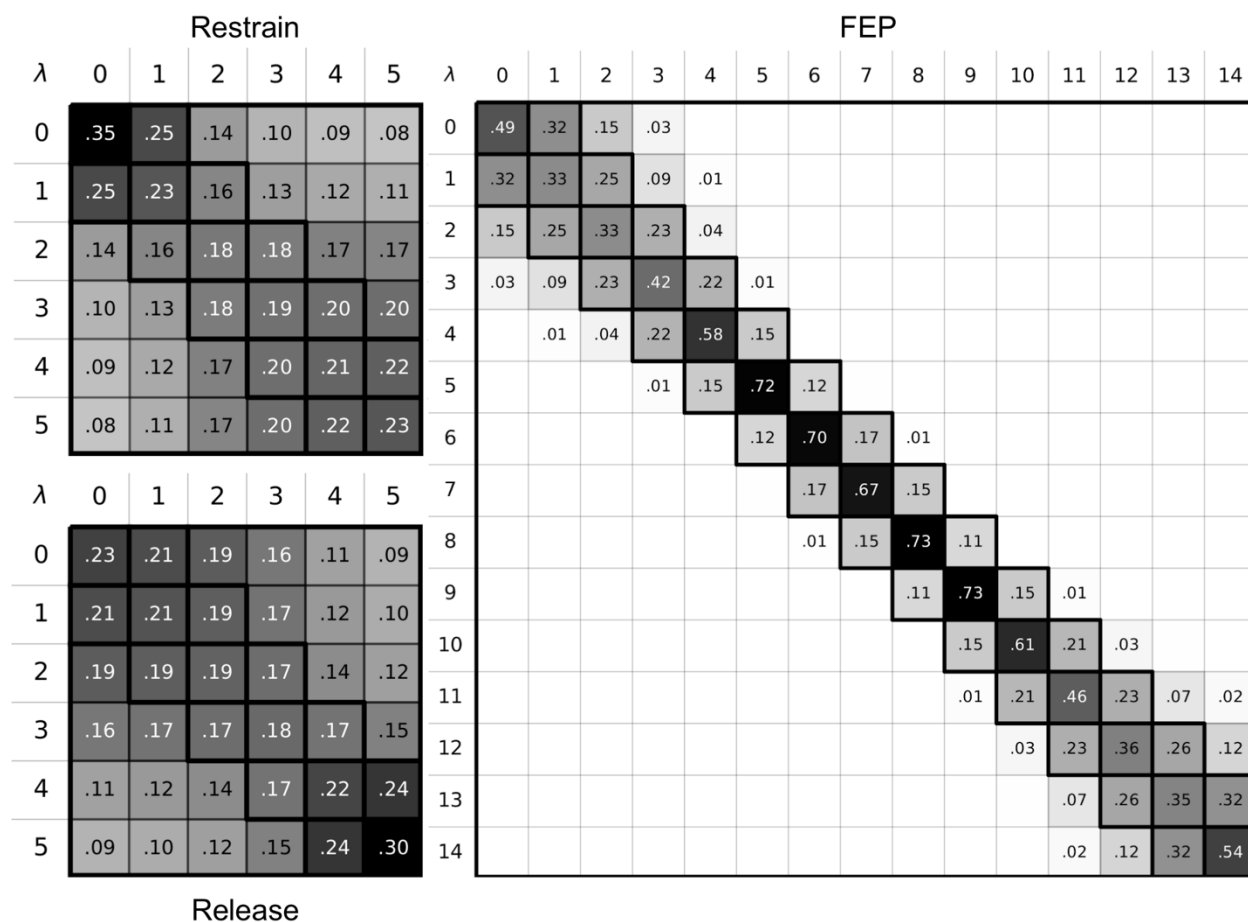

**Figure S11.** Overlap matrices for the three stages of transformation of 8-oxoguanine from *anti* to *syn* conformation. The element  $O_{ij}$  is the probability of observing a sample from state  $i$  ( $i^{\text{th}}$  row) in state  $j$  ( $j^{\text{th}}$  column). The recommended minimum probability for adjacent states (highlighted by thick black lines) is 0.03.<sup>10</sup>

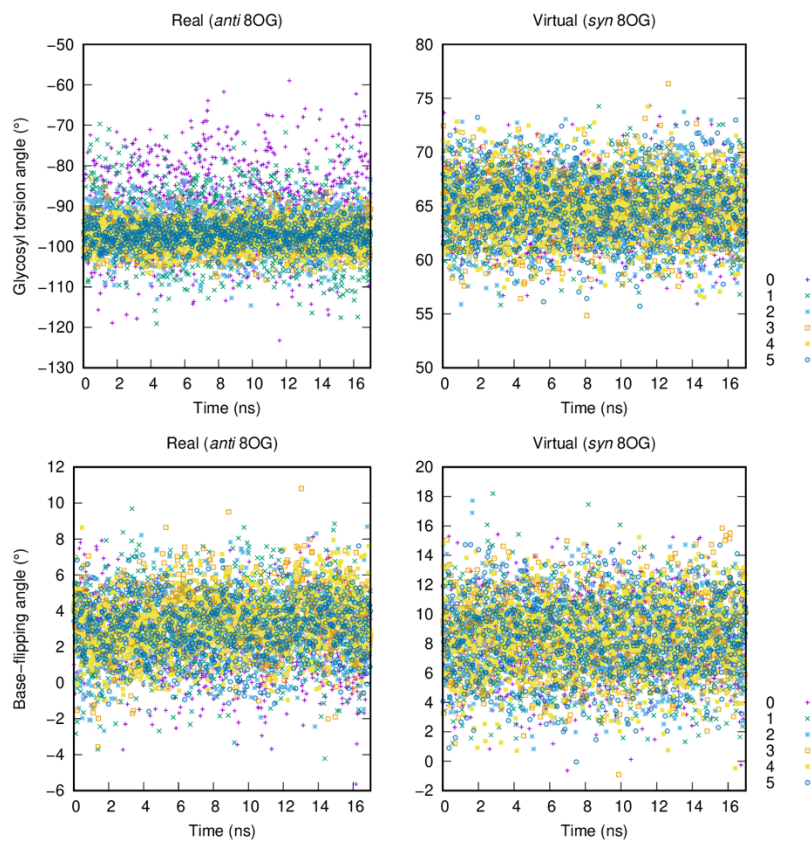

**Figure S12.** Time evolution of the glycosyl and base-flipping torsion angles of *anti* and *syn* 8-oxoguanine (8OG) at all  $\lambda$ -states during the “restrain” stage of the transformation (data collected every 20 ps). The harmonic restraints on the real atoms were switched on from state 0 to state 5, while those on the virtual atoms were on at all  $\lambda$ -states.



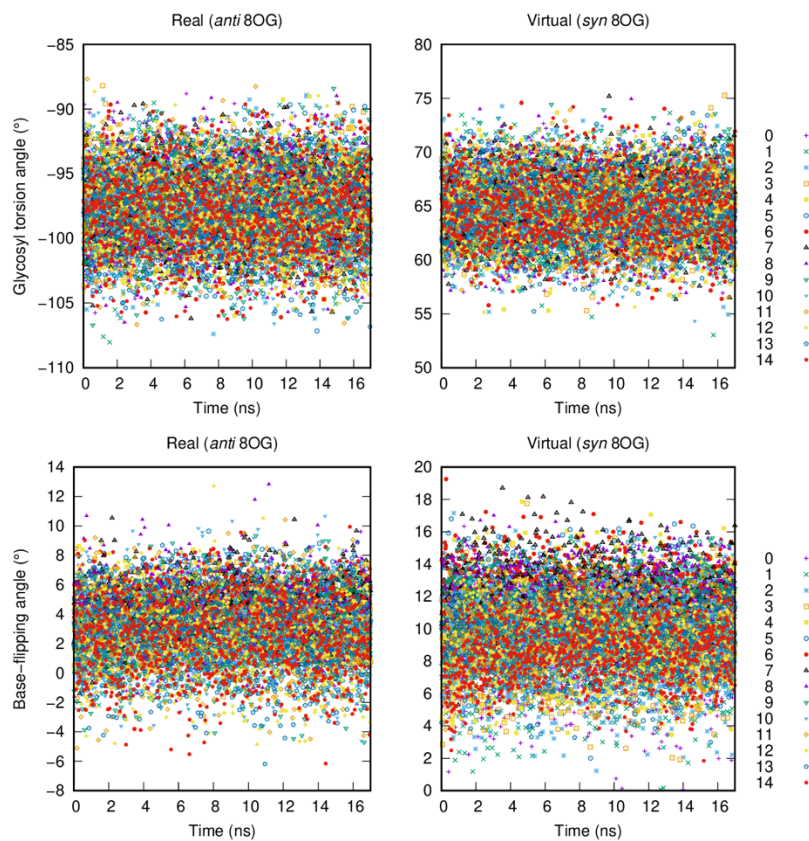

**Figure S13.** Time evolution of the glycosyl and base-flipping torsion angles of *anti* and *syn* 8-oxoguanine (8OG) at all  $\lambda$ -states during the “FEP” stage of the transformation (data collected every 20 ps). The harmonic restraints on both real and virtual atoms were on at all  $\lambda$ -states.

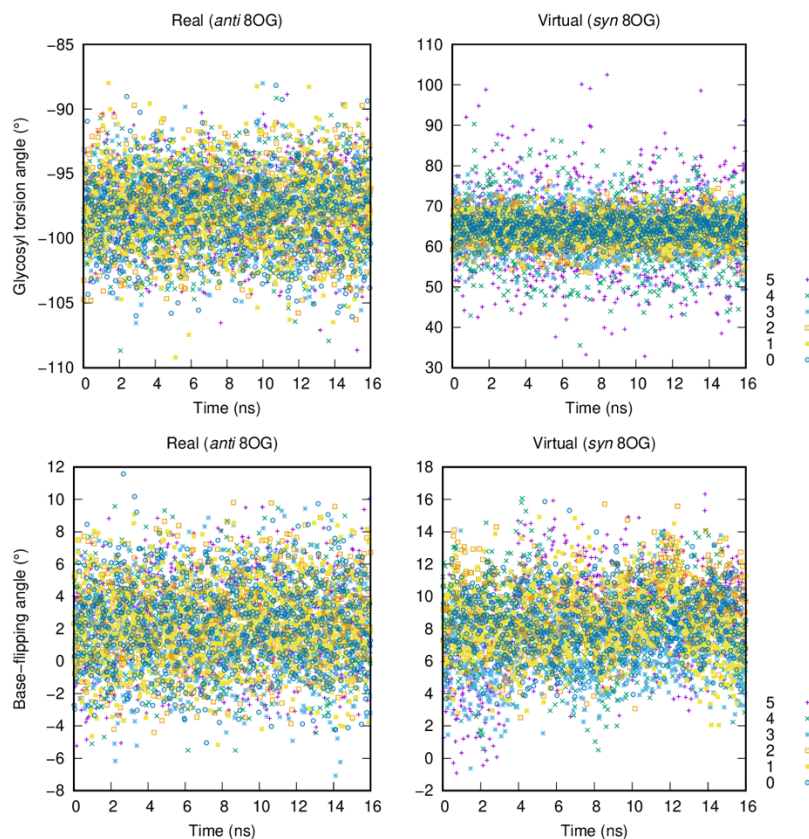

**Figure S14.** Time evolution of the glycosyl and base-flipping torsion angles of *anti* and *syn* 8-oxoguanine (8OG) at all  $\lambda$ -states during the “release” stage of the transformation (data collected every 20 ps). The harmonic restraints on the virtual atoms were switched off from state 0 to state 5, while those on the real atoms were on at all  $\lambda$ -states.

## References

- (1) Pastor, R. W.; Brooks, B. R.; Szabo, A. An Analysis of the Accuracy of Langevin and Molecular Dynamics Algorithms. *Mol. Phys.* **1988**, *65*, 1409–1419.
- (2) Berendsen, H. J. C.; Postma, J. P. M.; van Gunsteren, W. F.; DiNola, A.; Haak, J. R. Molecular Dynamics with Coupling to an External Bath. *J. Chem. Phys.* **1984**, *81*, 3684–3690.
- (3) Parrinello, M.; Rahman, A. Polymorphic Transitions in Single Crystals: A New Molecular Dynamics Method. *J. Appl. Phys.* **1981**, *52*, 7182–7190.
- (4) Essmann, U.; Perera, L.; Berkowitz, M. L.; Darden, T.; Lee, H.; Pedersen, L. G. A Smooth Particle Mesh Ewald Method. *J. Chem. Phys.* **1995**, *103*, 8577–8593.
- (5) Hess, B.; Bekker, H.; Berendsen, H. J. C.; Fraaije, J. G. E. M. LINCS: A Linear Constraint Solver for Molecular Simulations. *J. Comput. Chem.* **1997**, *18*, 1463–1472.
- (6) Frisch, M. J.; Trucks, G. W.; Schlegel, H. B.; Scuseria, G. E.; Robb, M. A.; Cheeseman, J. R.; Scalmani, G.; Barone, V.; Petersson, G. A.; Nakatsuji, H.; et al. Gaussian 09, Revision A.02. Gaussian, Inc.: Wallingford CT 2016.
- (7) Bayly, C. I.; Cieplak, P.; Cornell, W.; Kollman, P. A. A Well-Behaved Electrostatic Potential Based Method Using Charge Restraints for Deriving Atomic Charges: The RESP Model. *J. Phys. Chem.* **1993**, *97*, 10269–10280.
- (8) Cieplak, P.; Cornell, W. D.; Bayly, C.; Kollman, P. A. Application of the Multimolecule and

- Multiconformational RESP Methodology to Biopolymers: Charge Derivation for DNA, RNA, and Proteins. *J. Comput. Chem.* **1995**, *16*, 1357–1377.
- (9) Wang, J.; Wang, W.; Kollman, P. A.; Case, D. A. Automatic Atom Type and Bond Type Perception in Molecular Mechanical Calculations. *J. Mol. Graph. Model.* **2006**, *25*, 247–260.
- (10) Klimovich, P. V; Shirts, M. R.; Mobley, D. L. Guidelines for the Analysis of Free Energy Calculations. *J. Comput. Aided. Mol. Des.* **2015**, *29*, 397–411.
